# Supplementary material
Source: PubMed Central journal article supplement (PMC4966443)
Supplement: JB.00820-15_zjb999094135so1.pdf [file JB.00820-15_zjb999094135so1.pdf]

Supplemental material to the manuscript:

**Transcription of sialic acid catabolism genes in *Corynebacterium glutamicum* is subject to catabolite repression and control by the transcriptional repressor NanR**

**By Andreas Uhde, Natalie Brühl, Oliver Goldbeck, Christian Matano, Oksana Gurow, Christian Rückert, Kay Marin, Volker F. Wendisch, Reinhard Krämer, Gerd M. Seibold**

The supplementary data comprise four tables (Table S1, S2, S3, S4) and eleven figures (Fig. S1, Fig. S2, Fig. S3, Fig. S4, Fig. S5, Fig. S6, Fig. S7, Fig. S8, Fig. S9, Fig. S10, Fig. S11).

Correspondence: Gerd M. Seibold, Institute of Microbiology & Biotechnology, University of Ulm, 89081 Ulm, Germany. Tel.: +49 (0)731 502 4853; fax: +49 (0)731 502 2719; e-mail: [gerd.seibold@uni-ulm.de](mailto:gerd.seibold@uni-ulm.de)

**Table S1.** Characteristics of transcriptional regulators of Neu5Ac catabolism in bacteria

| Organism              | Name | Regulator Superfamily | Function  | Neu5Ac-transporter | Binding motif         | Effector/Inducer           | References     |
|-----------------------|------|-----------------------|-----------|--------------------|-----------------------|----------------------------|----------------|
| <i>E. coli</i>        | NanR | GntR/FadR             | repressor | secondary          | GGTATA                | Neu5Ac                     | (1, 2)         |
| <i>B. breve</i>       | NanR | GntR/FadR             | repressor | secondary          | ATNAGACATCAGANGTCCCAT | Neu5Ac                     | (3, 4)         |
| <i>C. glutamicum</i>  | NanR | GntR/FadR             | repressor | ABC                | AMGYMTGATGTCWKATGTMTA | GlcNAc-6P, ManNAc-6P       | (5), this work |
| <i>V. vulnificus</i>  | NanR | RpiR                  | repressor | TRAP               | GTTTGAAAAAAATCTTCGT   | ManNAc-6P                  | (6)            |
| <i>C. perfringens</i> | NanR | RpiR                  | n.d.      | secondary          | GAAAAATATTTTC         | n.d.                       | (7)            |
| <i>Staph. aureus</i>  | NanR | RpiR                  | repressor | secondary          | n.d.                  | ManNAc-6P                  | (8)            |
| <i>H. influenzae</i>  | SiaR | RpiR                  | repressor | TRAP               | n.d.                  | GlcN-6P (enhances binding) | (9-12)         |
| <i>S. pneumoniae</i>  | NanR | RpiR                  | activator | ABC + secondary    | TCTGAAASTACTTTCARA    | n.d.                       | (13)           |

n.d. – not determined

**Table S2.** Oligonucleotides used in this study

| Name              | Sequence (5'-3') <sup>a</sup>                             | Purpose, restriction site                             |
|-------------------|-----------------------------------------------------------|-------------------------------------------------------|
| PnanR_shift_rev   | GTCGCGCACTGCTTCTTGAG                                      | probes PnanR, PnanR-A, PnanR-B, PnanR-C               |
| PnanR_shift_fwd   | GTGTTAAGTTGAGTGCCGGA                                      | probe PnanR                                           |
| PnanR_shift_A_fwd | GTCGTTAAGTTACTGTGGCG                                      | probe PnanR-A                                         |
| PnanR_shift_B_fwd | GATTTGCAGACTACAGACTA                                      | probe PnanR-B                                         |
| PnanR_shift_C_fwd | CCATTCATTTACACGTA AAAAGAC                                 | probe PnanR-C                                         |
| nagA-for          | GAGTAGTTACCACCGCAGCT                                      | probes PnagA, PnagA-M4, PnagA-A, PnagA-B              |
| nagA-rev          | GAGAAAGCCATCAATCACCC                                      | probes PnagA, PnagA-M4                                |
| nagA-A-rev        | AGGACGTATGATGTCTTATG                                      | probe PnagA-A                                         |
| nagA-B-rev        | CGGATTTAGGTTAATTATCTTC                                    | probe PnagA-B                                         |
| siaEFGI_fwd       | GCTACCTGCAGGAGAGATATAACCATGAGCACCACGATTACTC               | pEKEx2- <i>siaEFGI</i> , <i>SbfI</i>                  |
| siaEFGI_rev       | CTAATGGTGATGATGGTGATGCAAACGAGTTTTGTTTCAGCAG               | pEKEx2- <i>siaEFGI</i>                                |
| D_nanR_P1         | CGTATGCTGCAGTGGTGGTCATTGGGTCGTAG                          | pK19 <i>mobsacBΔnanR</i> , <i>PstI</i>                |
| D_nanR_P2         | TGTTTTAAGTTT TAGTGGATGGGGTGTTCACTTCCTAATCTGGAG            | pK19 <i>mobsacBΔnanR</i>                              |
| D_nanR_P3         | CCCATCCACTAAACTTAAACAGCTCACTACGCGCCGTTTCG                 | pK19 <i>mobsacBΔnanR</i>                              |
| D_nanR_P4         | CTTGACCCGGGAATATCGGTGATGTGGCCATCG                         | pK19 <i>mobsacBΔnanR</i> , <i>XmaI</i>                |
| check_D_nanR_fwd  | TGCCGTCTAGAAACTTGCAG                                      | Verification of <i>nanR</i> deletion                  |
| check_D_nanR_rev  | AATGAGGCTAGTGCGCATCG                                      | Verification of <i>nanR</i> deletion                  |
| IBA_nanR_fwd      | GCTTCAGGATCCACGACAGTCGATATGATCAG                          | pASK_IBA3_ <i>nanR</i> , <i>BamHI</i> , probe control |
| IBA_nanR_rev      | GCTTACTGCAGGTGCGCATCGAGCATGTTGG                           | pASK_IBA3_ <i>nanR</i> , <i>PstI</i> , probe control  |
| OE_nanR_fwd       | GCTACCTGCAGGACGACAGTCGATATGATCAG                          | pEKEx2- <i>nanR</i> , <i>SbfI</i>                     |
| OE_nanR_rev       | CTCAGGATCCAATGAGGCTAGTGCGCATCG                            | pEKEx2- <i>nanR</i> , <i>BamHI</i>                    |
| PsiaE_fwd         | GCTCATGCATACCTGCAAGTTTCTAGACGG                            | pEPRI- <i>PsiaE</i> , <i>NsiI</i>                     |
| PsiaE_rev         | GCTGGATCCGGTTGCTCGGAGGAAATTGC                             | pEPRI- <i>PsiaE</i> , <i>BamHI</i>                    |
| PnanH_fwd         | GCCTCTAGATTCCACGCCGGTCTTCTCTAC                            | probe PnanH, pEPRI- <i>PnanH</i> , <i>XbaI</i>        |
| PnanH_rev         | CGCGGATCCTTATTCGCTGATGCTTGCTGTTG                          | probe PnanH, pEPRI- <i>PnanH</i> , <i>BamHI</i>       |
| ptsG-probe-fw     | CAAACCTGACGACGACATC                                       | <i>ptsG</i> probe for dot blot analyses               |
| ptsG-probe-T7-rv  | <u>GGGCCCTAATACGACTCACTATAGGGTGGCAGGAAGTAGAAGAC</u>       | <i>ptsG</i> probe for dot blot analyses               |
| 16S-probe-fw      | GAATTCGATGCACCGAGTGGAAGT                                  | 16S RNA gene probe for dot blot analyses              |
| 16S-probe-T7-rv   | <u>GGGCCCTAATACGACTCACTATAGGGGGTACCGAACCAGTGTGGCACATC</u> | 16S RNA gene probe for dot blot analyses              |
| PnanA_fwd         | GGTAGGATCCGATCACGCCGGTGAAAGTTG                            | pEPRI- <i>PnanA</i> , <i>BamHI</i>                    |
| PnanA_rev         | GGTAATGCATTAGGACGTATGATGTCTTATG                           | pEPRI- <i>PnanA</i> , <i>NsiI</i>                     |
| PnanR_fwd         | GCCATGCATAGGCCGTGAGTTGAATTGTG                             | pEPRI- <i>PnanR</i> , <i>NsiI</i>                     |
| PnanR_rev         | CGCGGATCCTTAGTCGCGCACTGCTTCTTGAG                          | pEPRI- <i>PnanR</i> , <i>BamHI</i>                    |

<sup>a</sup> Restriction sites in the oligonucleotides are shown in italics and T7 polymerase stat sites are underlined

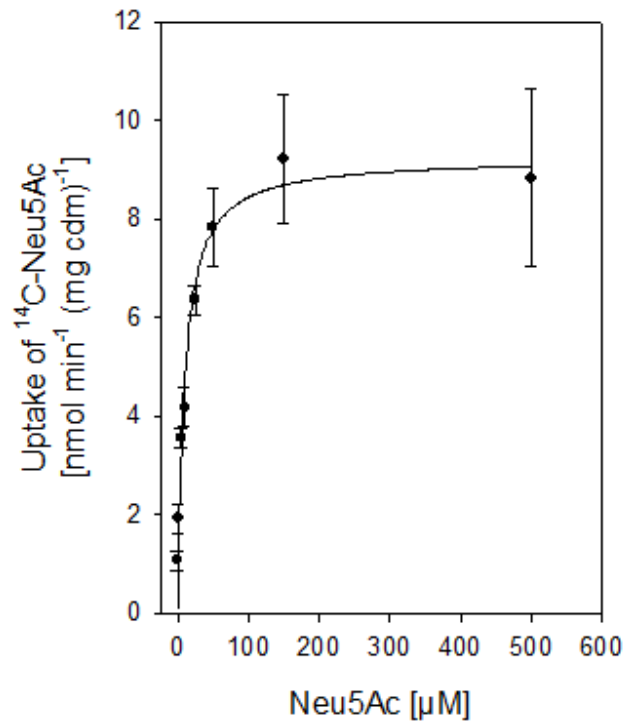

**Fig. S1:** Neu5Ac uptake of *C. glutamicum* WT cultivated in minimal medium with 0.2 % (w/v) Neu5Ac, different concentrations (0.5 - 500 μM) of [<sup>14</sup>C]-Neu5Ac were tested. Data represent mean values of three independent measurements from 2 independent cultivations and were fitted according to the Michaelis-Menten equation.

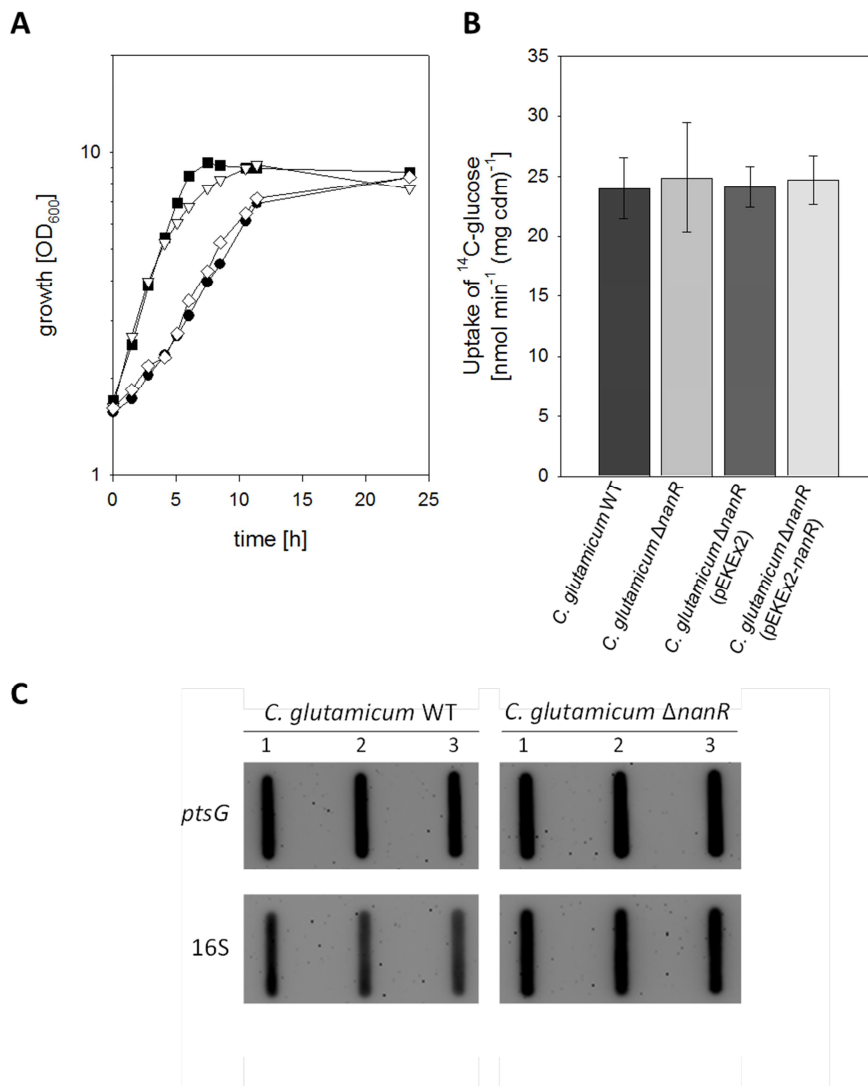

**Fig. S2:** Growth of *C. glutamicum* WT [black squares], *C. glutamicum* Δ*nanR* [black circles], *C. glutamicum* Δ*nanR* (pEKEx2) [white diamonds], and *C. glutamicum* Δ*nanR* (pEKEx2-*nanR*) [white triangles] in minimal medium with 1 % (w/v) glucose (A). Three independent cultivations were performed; data from one representative experiment are shown, results of each of the cultivations were comparable. Analyses of [<sup>14</sup>C]glucose uptake in *C. glutamicum* WT, *C. glutamicum* Δ*nanR*, *C. glutamicum* Δ*nanR* (pEKEx2), and *C. glutamicum* Δ*nanR* (pEKEx2-*nanR*) (B) after cultivation in TY complex medium. The glucose uptake data represent mean values and standard deviations of three independent measurements from three independent cultivations. Analyses of *ptsG* transcription (C) in *C. glutamicum* WT and *C. glutamicum* Δ*nanR*. For each strain samples from three independent cultivations in minimal medium with 1 % (w/v) glucose were analyzed. The *ptsG* and 16S RNA levels were monitored in the RNA hybridization experiments with DIG-labeled antisense RNA probes.

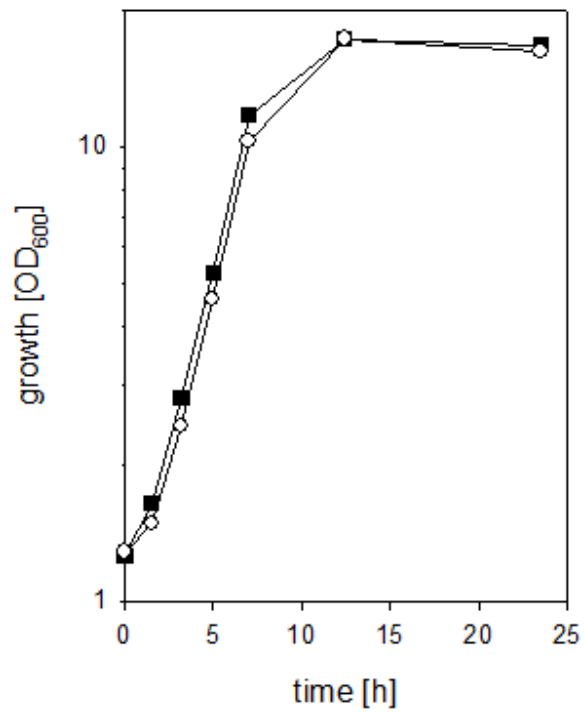

**Fig. S3:** Growth of *C. glutamicum* WT [black squares] and *C. glutamicum*  $\Delta nanR$  [white diamonds] in minimal medium with 1 % (w/v) fructose. At least three independent cultivations were performed; data from one representative experiment are shown, results of each of the cultivations were comparable.

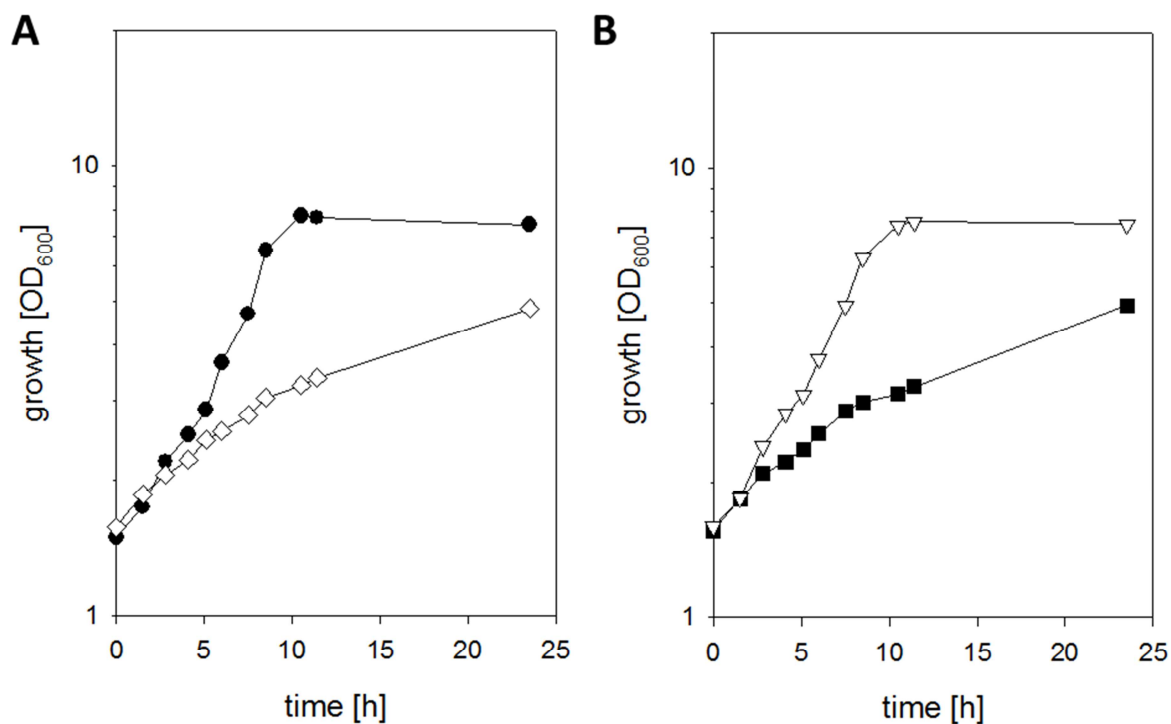

**Fig. S4.** Growth in minimal medium with 0.5 % (w/v) glucosamine as sole source of carbon and energy of *C. glutamicum* WT [black circles] and *C. glutamicum*  $\Delta nanR$  [white diamonds] (in panel A) as well as *C. glutamicum*  $\Delta nanR$  (pEKEEx2-*nanR*) [white triangles] and *C. glutamicum*  $\Delta nanR$  (pEKEEx2) [black squares] (in panel B). Three independent cultivations were performed; data from one representative experiment are shown, results of each of the cultivations were comparable.

**Table S3.** Gene expression differences between *C. glutamicum* WT and *C. glutamicum*  $\Delta$ nanR during exponential growth in LB medium. This table lists genes that showed statistically significant ( $P < 0.05$ ) expression changes by at least a factor of four. For operons, all genes are listed.

| Gene <sup>a</sup> | Annotation <sup>b</sup>                                                   | mRNA <sup>c</sup><br>( $\Delta$ nanR/WT) |
|-------------------|---------------------------------------------------------------------------|------------------------------------------|
| cg0809            | septumformationproteinMaf-likeprotein                                     | 0.14                                     |
| cg0810            | conservedhypotheticalprotein                                              | 0.23                                     |
| cg0811            | AccD2, acetylCoAcarboxylase□-subunit                                      | 0.16                                     |
| cg0814            | BirA, biotinproteinligase                                                 | 0.19                                     |
| cg0815            | putative membrane protein                                                 | 0.19                                     |
| cg0828            | putativedihydrofolatereductase                                            | 0.16                                     |
| cg0829            | hypothetical protein                                                      | 0.13                                     |
| cg0830            | putative membrane protein                                                 | 0.12                                     |
| cg1139            | Allophanate hydrolase subunit 2                                           | 0.15                                     |
| cg1140            | Allophanate hydrolase subunit 1                                           | 0.16                                     |
| cg1141            | putative LamB-family lactam utilization protein                           | 0.19                                     |
| cg1142            | Na <sup>+</sup> /proline, Na <sup>+</sup> /panthothenatesymporter         | 0.31                                     |
| cg3226            | putative L-lactate permease                                               | 0.16                                     |
| cg0043            | ABC transporter ATP-bindingprotein                                        | 19.7                                     |
| cg0395            | hypotheticalprotein                                                       | 4.9                                      |
| cg0759            | PrpD2, methylcitratedehydratase                                           | 14.9                                     |
| cg0760            | PrpB2, methylisocitratelase                                               | 4.0                                      |
| cg0762            | PrpC2, methylcitratelase                                                  | 8.5                                      |
| cg0796            | PrpD1, methylcitratedehydratase                                           | 1.4                                      |
| cg0797            | PrpB1, methylisocitratelase                                               | 4.0                                      |
| cg0798            | PrpC1, methylcitratelase                                                  | 1.5                                      |
| cg1295            | putativealpha/beta superfamilylhydrolase/acyltransferase                  | 6.1                                      |
| cg1420            | GatB, aspartyl/glutamyl-tRNAamidotransferasesubunit B                     | 9.9                                      |
| cg1590            | putativesecretedmagnesiumchelatesubunit                                   | 6.5                                      |
| cg1612            | putativeacetyltransferase                                                 | 6.1                                      |
| cg2430            | hypotheticalprotein                                                       | 4.0                                      |
| cg2479            | hypotheticalprotein                                                       | 14.0                                     |
| cg2623            | PcaI, acyl-CoA:3-ketoacid-coenzyme A transferasesubunit                   | 4.3                                      |
| cg2746            | putativetranscriptionalregulator                                          | 6.5                                      |
| cg2917            | conservedhypotheticalprotein                                              | 6.1                                      |
| cg2927            | ScrB, sucrose 6-phosphate hydrolase                                       | 2.0                                      |
| cg2928            | NagB, glucosamine-6-phosphate deaminase                                   | 10.6                                     |
| cg2929            | NagA1, N-acetylglucosamine-6-phosphate deacetylase                        | 337.8                                    |
| cg2931            | NanA, N-acetylneuraminatylase (aldolase)                                  | 147.0                                    |
| cg2932            | NanK, N-acetylmannosaminekinase                                           | 168.9                                    |
| cg2933            | NanE, N-acetylmannosamine-6-phosphate 2-epimerase                         | 97.0                                     |
| cg2937            | dipeptide/oligopeptideABC transport system, substrate-binding lipoprotein | 9.9                                      |
| cg2938            | dipeptide/oligopeptideABC transport system, permease subunit              | 78.8                                     |
| cg2939            | dipeptide/oligopeptideABC transport system, ATPase subunit                | 25.2                                     |
| cg2940            | dipeptide/oligopeptideABC transport system, ATPase subunit                | 274.4                                    |
| cg2942            | putative AsnC-family transcriptional regulator                            | 7.5                                      |
| cg3185            | conservedhypotheticalprotein                                              | 4.6                                      |
| cg3252            | putative membrane proteintranslocasesubunit                               | 4.0                                      |
| cg3407            | putative membrane protein                                                 | 12.1                                     |
| cg3419            | hypothetical protein                                                      | 4.3                                      |

<sup>a</sup>Genes showing significantly ( $P < 0.05$ ) altered mRNA levels by at least a factor of four are listed based on three independent DNA microarray hybridizations. For operons, all genes are listed. <sup>b</sup>Gene identifiers and annotations are given according to BX927147. <sup>c</sup>The mRNA levels were derived from a three independent cultivations.



**Table S4.** NagA and NagB specific activity in *C. glutamicum* strains during exponential growth in LB medium.

| <b>Strain</b>                      | <b>NagA<br/>[U/mg protein]</b> | <b>NagB<br/>[U/mg protein]</b> |
|------------------------------------|--------------------------------|--------------------------------|
| <i>C. glutamicum</i> WT            | 0.012 ± 0.001                  | 0.014 ± 0.008                  |
| <i>C. glutamicum</i> $\Delta nanR$ | 0.453 ± 0.119                  | 0.251 ± 0.078                  |

```

nagA-rev >
GAGAAA GCCATCAATC ACCC
1 gttggagaaa gccatcaatc accccgtggg gggtaacaat tcttccttca atttttttaa ctgcttgacc tgcattttct tgataatgca ccacttctgc catctttctg
caacctcttt cggtagttag tggggcacc cccattgtta agaaggaagt taaaaaatt gacgaactgg acgtaaaga actattacgt ggtgaagacg gtgagaagac
<<.....nagA.....<<
<
+1 nagA

nagA-A-rev >          nagA-B-rev >
AG GACGTATGAT GTCTTATG          CCGATTTA GGTTAATTAT CTTC
111 aggttatttg cttccttcca gcaagcatag gacgtatgat gtcttatgtc tacggattta ggtaattat cttcggactt gaggcctgct gttgcaggtc tactgaatta
tccaataaac gaaggaaggc cgttcgtatc ctgcatacta cagaatacag atgcctaaat ccaattaata gaagcctgaa ctccggacga caacgtccag atgacttaat
<<..<<          <          <<..<<          NanR binding site          >>..>>          >
-10 nagA1      +1 nagA2      -35 nagA1          -10 nanA2      +1 nanA2
          <<..<<          <<..<<
          -10 nagA2          -35 nagA2

221 cctcagcctt ccaagctgat gatgcattac ttaaaaactg cagacacttg aaaaacttct caccgcact cgttcctca acccacaagg agcaccatgg cttccgcaac
ggagtcggaa ggttcgacta ctacgtaatg aatttttgac gtctgtgaac tttttgaaga gtgggcgtga gcaagggagt tgggtgttcc tcgtggtacc gaagcggtg
-35-I cg2931 >>...>>          >>...>>          >
          -10-I cg2931 >>...>>
          +1-I cg2931 >

          >>...nanA.....

          < nagA-for
          GA GTAGTTACCA CCGCAGCT
331 tttcacgggc gtgatccac cagtaatgac cccactccac gccgacggca gtgtggatgt agaaagcctc cgcaagctcg ttgaccacct catcaatggt ggcgtcgaag
aaagtggccg cactaggggtg ggcattactg ggtgaggtg cggctgccgt cacacctaca tctttcgag gcgttcgagc aactggtgga gtagttacca ccgacgtgc
>.....nanA'.....>>

```

**Fig S5.** Genomic locus of the intergenic region of the *C. glutamicum* *nagA* and *nanA* genes, localization of primers used for EMSA experiments, the NanR binding site, transcriptional start sites as well as -10 and -35 regions. The transcriptional start sites, -10 regions, and -35 regions are taken from the publication by Pfeifer-Sancar et al., 2013 (14).

```

PnanR_Shift_rev >
GTCGC GCACTGCTTC TTGAG
1 ttaatgtcgc gcactgcttc ttgagtagtg gaccttgatc gcgaagtctt tttggagctt tccattgtgt tcaacttcta atctggagat ggttctgatc atatcgactg
aattacagcg cgtgacgaag aactcatcac ctggaactag cgcttcagaa aaacctcgaa aggtaacaca agtgaaggat tagacctcta ccaagactag tatagctgac
<<.....'nanR.....>>
< <<...<<
+1 nanRA -10 nanRA

< PnanR_shift_C_fwd
CCATT CATTACACG TAAAAGAC
111 tegtttccat cagaccccat cegtcttacc tgaagtgttc tcagatgttc tacctgcaag tttctagacg gcacccact gtaggggtaa gtaaagtgc atttctgaa
agcaaaggta gtctggggta ggcagaatag acttcacgaa agtctacaag atggacgttc aaagatctgc cgtgggggta catccccatt catttacacg taaaagactt

< PnanR_shift_B_fwd < PnanR_shift_A_fwd
GATTTCAG ACTACAGACT A GTCGT TAAGTTACTG TGGCG GTGTTAA
221 atgatttcaa aaaatttatt cctaaacgctc tgatgtctga tgtatattga cactacagca attcaatgac accgctcaca atttctttaa atgagcatag cgtcacaatt
tactaaagtt ttttaataa ggatttgacg actacagact acatataact gtgatgtcgt taagttactg tggcgagtgt taaagaaaat tactcgtatc gcagtgtaa
NanR binding site
>>...>> < >>...>> > < <<...<<
-35 siaE +1 nanRB -10 siaE +1 siaE +1 nanRC -10 nanRC

< PnanR_shift_fwd
GTTGAGTGCC GGA
331 caactcacgg cctgggcccc tcttttaaaa aggatgtacc tcatgagcac caagattact cgccgcaatt tctctcagac aaccggaatc
gttgagtgcc ggacccgggg agaaaatttt tctacatgg agtactcgtg gtgctaataa gcggcgtaa aggaggctcg ttggccttag
>>.....'siaE'.....>>
< <<...<<
-35 nanRC +1 nanRD

```

**Fig S6.** Genomic locus of the intergenic region of the *C. glutamicum nanR* and *siaE* genes, localization of primers used for EMSA experiments, the NanR binding site, transcriptional start sites as well as -10 and -35 regions. The transcriptional start sites, -10 regions, and -35 regions are taken from the publication by Pfeifer-Sancar et al., 2013 (14).



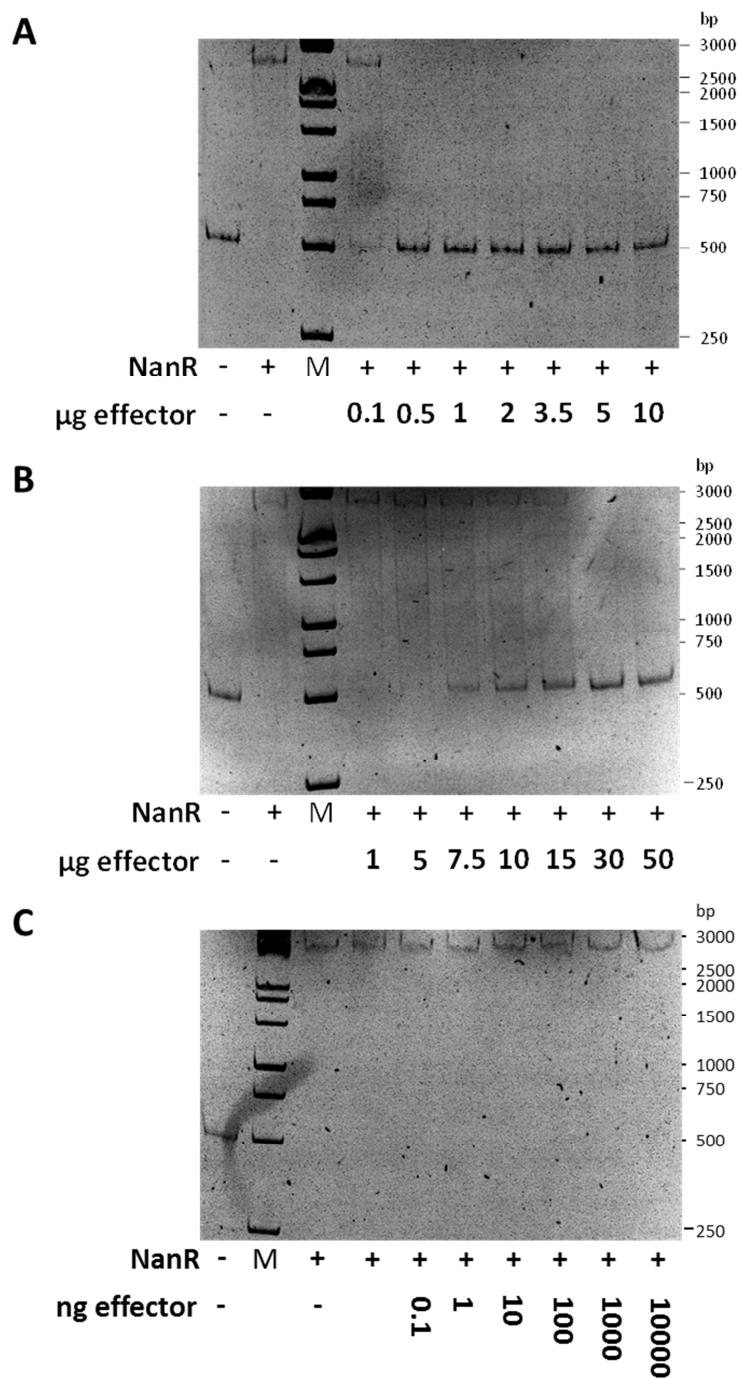

**Fig. S8.** Representative EMSA experiments using 0.3 µg NanR with 10 ng of the probe PnagA and (0 – 10 µg) GlcNAc-6P [A], (0 – 50 µg) ManNAc-6P [B] or [0 – 10 µg] Neu5Ac.

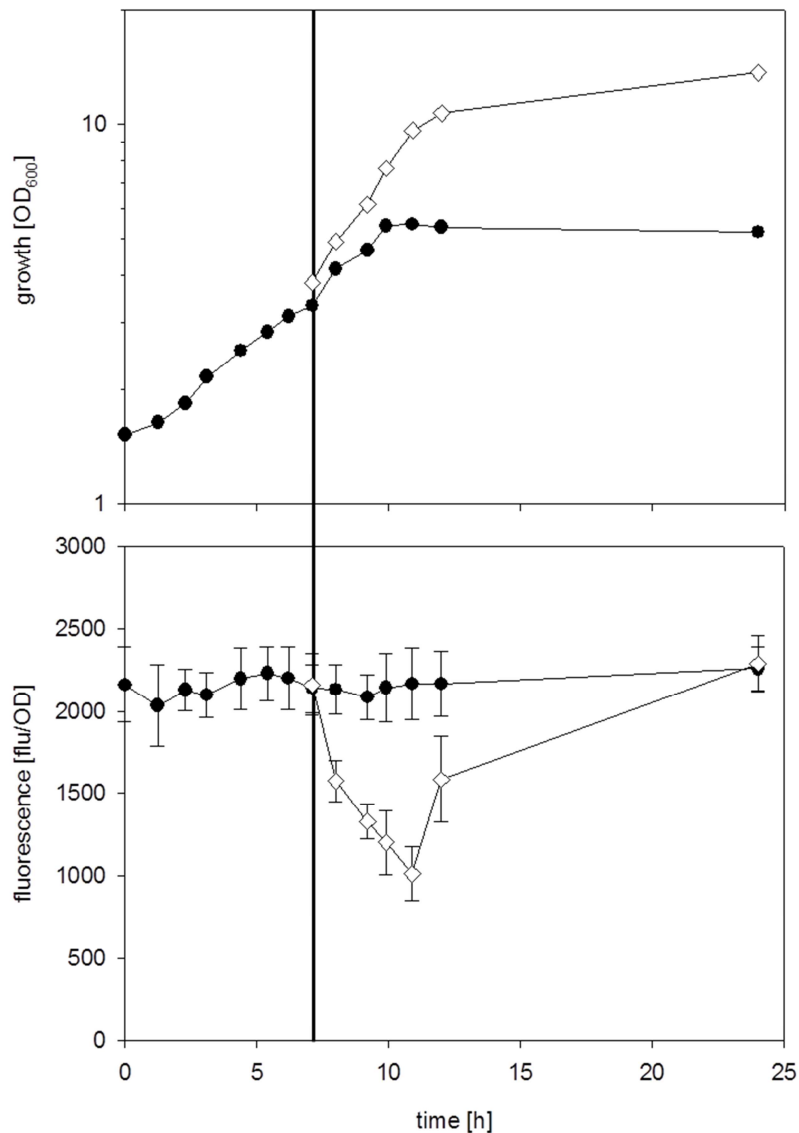

**Fig. S9.** Growth of *C. glutamicum* WT (pEPRI\_PRnagAB\_WT) and relative fluorescence of the GFP reporter in minimal medium with initially 0.3 % (w/v) Neu5Ac as substrate, after 6 h of cultivation the culture was split into two separate cultures (indicated by the line), of these two cultures one contained additionally 0.3 % (w/v) glucose (white diamonds), whereas no additional carbon source was added to the second culture (black circles). Cells were pre-cultivated in minimal medium with 0.3 % (w/v) Neu5Ac. Three independent cultivations were performed; growth data from one representative experiment are shown, results of each of the cultivations were comparable. GFP fluorescence data represent mean values and standard deviations of two independent measurements each from three independent cultivations.

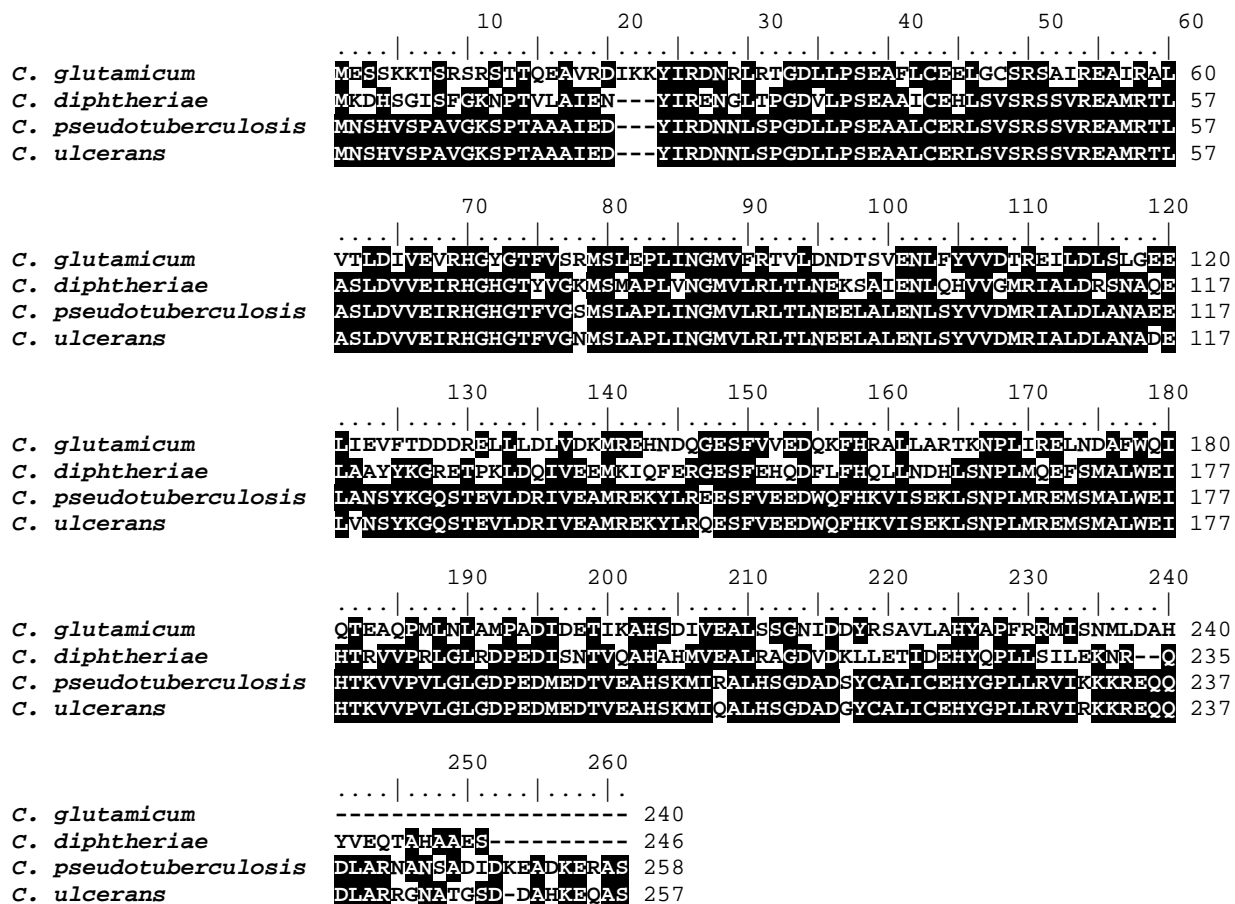

**Fig. S10:** Alignment of (putative) NanR sequences of *C. glutamicum*, *C. diphtheria*, *C. pseudotuberculosis*, and *C. ulcerans*, black shading indicates identical amino acids, grey shading indicates similar amino acids.

**A**

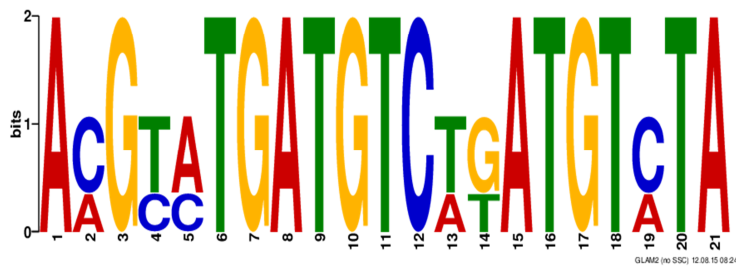

**B**

|                                   |                             |
|-----------------------------------|-----------------------------|
| <i>C. glutamicum nagA-nanA</i>    | ACG TAT GAT GTC TTA TGT CTA |
| <i>C. glutamicum M4 nagA-nanA</i> | ACG TAT GAC GTC TTA TGT CTA |
| <i>C. glutamicum nanR-siaE</i>    | ACG TCT GAT GTC TGA TGT ATA |
| <i>C. glutamicum nanH</i>         | AAG CAT GAT GTC AGA TGT CTA |

**C**

|                                        |                             |
|----------------------------------------|-----------------------------|
| <i>C. diphtheriae nanR-siaE</i>        | ACG TCT GAT GTC AGG GGT GAA |
| <i>C. ulcerans nanR-siaE</i>           | ACG TCA GAC GTC TGA TGT ATT |
| <i>C. pseudotuberculosis nanR-siaE</i> | ACG TCA GAC GTC TGA TGT ATT |

**Fig. S11:** Sequence logo for the consensus motif of the NanR binding site in *C. glutamicum* generated using Glam2 (15) (A). Sequences of NanR binding site in promoter regions in *C. glutamicum* (B), the nucleotide exchange in the NanR binding site within the *nagA-nanA* intergenic region is indicated in yellow. Sequences of putative NanR binding sites within the intergenic regions of *nanR-siaE* in *C. diphtheriae*, *C. ulcerans*, and *C. pseudotuberculosis* identified using FIMO (16) (C).



## REFERENCES

1. **Kalivoda KA, Steenbergen SM, Vimr ER.** 2013. Control of the *Escherichia coli* sialoregulon by transcriptional repressor NanR. *J Bacteriol* **195**:4689-4701.
2. **Kalivoda KA, Steenbergen SM, Vimr ER, Plumbridge J.** 2003. Regulation of sialic acid catabolism by the DNA binding protein NanR in *Escherichia coli*. *J Bacteriol* **185**:4806-4815.
3. **Egan M, O'Connell Motherway M, van Sinderen D.** 2015. A GntR-type transcriptional repressor controls sialic acid utilization in *Bifidobacterium breve* UCC2003. *FEMS Microbiol Lett* **362**:1-9.
4. **Egan M, O'Connell Motherway M, Ventura M, van Sinderen D.** 2014. Metabolism of sialic acid by *Bifidobacterium breve* UCC2003. *Appl Environ Microbiol* **80**:4414-4426.
5. **Gruteser N, Marin K, Krämer R, Thomas GH.** 2012. Sialic acid utilization by the soil bacterium *Corynebacterium glutamicum*. *FEMS Microbiol Lett* **336**:131-138.
6. **Hwang J, Kim BS, Jang SY, Lim JG, You DJ, Jung HS, Oh TK, Lee JO, Choi SH, Kim MH.** 2013. Structural insights into the regulation of sialic acid catabolism by the *Vibrio vulnificus* transcriptional repressor NanR. *Proc Natl Acad Sci U S A* **110**:E2829-2837.
7. **Therit B, Cheung JK, Rood JI, Melville SB.** 2015. NanR, a transcriptional regulator that binds to the promoters of genes involved in sialic acid metabolism in the anaerobic pathogen *Clostridium perfringens*. *PLoS One* **10**:e0133217.
8. **Olson ME, King JM, Yahr TL, Horswill AR.** 2013. Sialic acid catabolism in *Staphylococcus aureus*. *J Bacteriol* **195**:1779-1788.
9. **Jenkins GA, Figueira M, Kumar GA, Sweetman WA, Makepeace K, Pelton SI, Moxon R, Hood DW.** 2010. Sialic acid mediated transcriptional modulation of a highly conserved sialometabolism gene cluster in *Haemophilus influenzae* and its effect on virulence. *BMC Microbiol* **10**:48.
10. **Johnston JW, Shamsulddin H, Miller AF, Apicella MA.** 2010. Sialic acid transport and catabolism are cooperatively regulated by SiaR and CRP in nontypeable *Haemophilus influenzae*. *BMC Microbiol* **10**:240.
11. **Johnston JW, Zaleski A, Allen S, Mootz JM, Armbruster D, Gibson BW, Apicella MA, Munson RS, Jr.** 2007. Regulation of sialic acid transport and catabolism in *Haemophilus influenzae*. *Mol Microbiol* **66**:26-39.
12. **Severi E, Randle G, Kivlin P, Whitfield K, Young R, Moxon R, Kelly D, Hood D, Thomas GH.** 2005. Sialic acid transport in *Haemophilus influenzae* is essential for lipopolysaccharide sialylation and serum resistance and is dependent on a novel tripartite ATP-independent periplasmic transporter. *Mol Microbiol* **58**:1173-1185.
13. **Afzal M, Shafeeq S, Ahmed H, Kuipers OP.** 2015. Sialic acid-mediated gene expression in *Streptococcus pneumoniae* and the role of NanR as a transcriptional activator of the *nan* gene cluster. *Appl Environ Microbiol*.
14. **Pfeifer-Sancar K, Mentz A, Ruckert C, Kalinowski J.** 2013. Comprehensive analysis of the *Corynebacterium glutamicum* transcriptome using an improved RNAseq technique. *BMC Genomics* **14**:888.
15. **Frith MC, Saunders NF, Kobe B, Bailey TL.** 2008. Discovering sequence motifs with arbitrary insertions and deletions. *PLoS Comput Biol* **4**:e1000071.
16. **Grant CE, Bailey TL, Noble WS.** 2011. FIMO: scanning for occurrences of a given motif. *Bioinformatics* **27**:1017-1018.
